# Supplementary material
Source: PubMed Central journal article supplement (PMC4987776)
Supplement: pnas.1609440113.sd01.pdf [file pnas.1609440113.sd01.pdf]

**Dataset S1.** DM production and nodulation levels in chickpea plants. Plants were inoculated with either the *McCP-31* or the *MmSWR19* and grown over a period of 30 d after sowing under Pi-sufficient (+P) or -deficient (-P) conditions. Data presented are the means  $\pm$  SE of four independent biological replicates. Data with different letters are significantly different as measured by a Duncan's multiple range test ( $P \leq 0.05$ ).

| Growth parameters                   | <i>MmSWR19</i>                 |                                |                     | <i>McCP-31</i>                 |                                |                     |
|-------------------------------------|--------------------------------|--------------------------------|---------------------|--------------------------------|--------------------------------|---------------------|
|                                     | Sufficient-Pi                  | Deficient-Pi                   | Change %<br>[+P/-P] | Sufficient-Pi                  | Deficient-Pi                   | Change %<br>[+P/-P] |
| <b>DM (g plant<sup>-1</sup>)</b>    |                                |                                |                     |                                |                                |                     |
| Shoot                               | 0.357 $\pm$ 0.006 <sup>a</sup> | 0.186 $\pm$ 0.016 <sup>d</sup> | -47.8               | 0.313 $\pm$ 0.004 <sup>b</sup> | 0.246 $\pm$ 0.001 <sup>c</sup> | -21.4               |
| Root                                | 0.132 $\pm$ 0.004 <sup>a</sup> | 0.085 $\pm$ 0.005 <sup>c</sup> | -35.6               | 0.103 $\pm$ 0.001 <sup>b</sup> | 0.090 $\pm$ 0.002 <sup>c</sup> | -12.6               |
| Whole plant                         | 0.545 $\pm$ 0.006 <sup>a</sup> | 0.323 $\pm$ 0.026 <sup>d</sup> | -40.7               | 0.473 $\pm$ 0.005 <sup>b</sup> | 0.411 $\pm$ 0.016 <sup>c</sup> | -13.1               |
| Root/shoot (g g <sup>-1</sup> )     | 0.369 $\pm$ 0.017 <sup>b</sup> | 0.456 $\pm$ 0.014 <sup>a</sup> | 24.30               | 0.329 $\pm$ 0.008 <sup>b</sup> | 0.365 $\pm$ 0.018 <sup>b</sup> | 15.60               |
| Nodule number plant <sup>-1</sup>   | 23.00 $\pm$ 0.914 <sup>c</sup> | 53.50 $\pm$ 2.986 <sup>a</sup> | 132.6               | 24.50 $\pm$ 0.500 <sup>c</sup> | 47.50 $\pm$ 2.362 <sup>b</sup> | 93.90               |
| Nodule DM (mg plant <sup>-1</sup> ) | 56.50 $\pm$ 2.362 <sup>b</sup> | 52.10 $\pm$ 4.132 <sup>b</sup> | -7.70               | 57.70 $\pm$ 2.684 <sup>b</sup> | 75.40 $\pm$ 4.362 <sup>a</sup> | 30.60               |
| Individual nodule DM (mg)           | 2.400 $\pm$ 0.204 <sup>a</sup> | 0.980 $\pm$ 0.056 <sup>c</sup> | -59.1               | 2.370 $\pm$ 0.082 <sup>a</sup> | 1.590 $\pm$ 0.119 <sup>b</sup> | -32.9               |
