# Supplementary material
Source: PubMed Central journal article supplement (PMC4987776)
Supplement: pnas.1609440113.sd02.pdf [file pnas.1609440113.sd02.pdf]

**Dataset S2.** Normalized values of metabolites in nodules of chickpea plants. Plants were inoculated with either the *McCP-31* or the *MmSWR19* and grown over a period of 30 d after sowing under Pi-sufficient (+P) or -deficient (-P) conditions. Data presented are the means  $\pm$  SE of four independent biological replicates. The values in bold and green indicate a significant increase in -P plants relative to +P plants, whereas the values in bold and red indicate a significant decrease in -P plants relative to +P plants. Data with different letters are significantly different as measured by a Duncan's multiple range test ( $P \leq 0.05$ ).

| Normalized values of metabolites | <i>MmSWR19</i>                 |                                 |                        | <i>McCP-31</i>                  |                                 |                        |
|----------------------------------|--------------------------------|---------------------------------|------------------------|---------------------------------|---------------------------------|------------------------|
|                                  | Sufficient-Pi                  | Deficient-Pi                    | Response ratio [-P/+P] | Sufficient-Pi                   | Deficient-Pi                    | Response ratio [-P/+P] |
| <b>Amino acids</b>               |                                |                                 |                        |                                 |                                 |                        |
| L-Glutamine                      | 0.150 $\pm$ 0.02 <sup>b</sup>  | 0.210 $\pm$ 0.02 <sup>b</sup>   | 1.40                   | 0.180 $\pm$ 0.01 <sup>b</sup>   | 0.300 $\pm$ 0.02 <sup>a</sup>   | <b>1.67</b>            |
| L-Asparagine                     | 3.070 $\pm$ 0.03 <sup>b</sup>  | 6.540 $\pm$ 0.60 <sup>a</sup>   | <b>2.13</b>            | 3.700 $\pm$ 0.60 <sup>b</sup>   | 3.760 $\pm$ 0.80 <sup>b</sup>   | 1.01                   |
| L-Phenylalanine                  | 1.160 $\pm$ 0.10 <sup>b</sup>  | 1.550 $\pm$ 0.07 <sup>a</sup>   | <b>1.33</b>            | 0.980 $\pm$ 0.06 <sup>bc</sup>  | 0.830 $\pm$ 0.10 <sup>c</sup>   | 0.84                   |
| GABA                             | 0.950 $\pm$ 0.10 <sup>a</sup>  | 0.310 $\pm$ 0.06 <sup>bc</sup>  | <b>0.32</b>            | 0.090 $\pm$ 0.004 <sup>c</sup>  | 0.350 $\pm$ 0.08 <sup>b</sup>   | <b>3.89</b>            |
| L-Homoserine                     | 2.460 $\pm$ 0.84 <sup>b</sup>  | 5.900 $\pm$ 0.50 <sup>a</sup>   | <b>2.39</b>            | 6.420 $\pm$ 0.60 <sup>a</sup>   | 6.750 $\pm$ 1.80 <sup>a</sup>   | 1.05                   |
| $\beta$ -Alanine                 | 0.240 $\pm$ 0.01 <sup>a</sup>  | 0.170 $\pm$ 0.006 <sup>b</sup>  | <b>0.70</b>            | 0.082 $\pm$ 0.01 <sup>c</sup>   | 0.140 $\pm$ 0.030 <sup>bc</sup> | 1.7                    |
| L-Threonine                      | 2.000 $\pm$ 0.11 <sup>a</sup>  | 1.600 $\pm$ 0.05 <sup>b</sup>   | <b>0.84</b>            | 0.950 $\pm$ 0.11 <sup>c</sup>   | 1.380 $\pm$ 0.07 <sup>b</sup>   | <b>1.45</b>            |
| D-Isoleucine                     | 0.270 $\pm$ 0.05 <sup>b</sup>  | 0.650 $\pm$ 0.03 <sup>a</sup>   | <b>2.40</b>            | 0.240 $\pm$ 0.04 <sup>b</sup>   | 0.280 $\pm$ 0.06 <sup>b</sup>   | 1.16                   |
| L-Alanine                        | 9.600 $\pm$ 1.50 <sup>a</sup>  | 8.800 $\pm$ 1.20 <sup>a</sup>   | 0.84                   | 3.100 $\pm$ 0.92 <sup>b</sup>   | 8.800 $\pm$ 1.70 <sup>a</sup>   | <b>2.83</b>            |
| L-Valine                         | 2.500 $\pm$ 0.13 <sup>ab</sup> | 2.900 $\pm$ 0.50 <sup>a</sup>   | 1.16                   | 2.400 $\pm$ 0.20 <sup>b</sup>   | 2.100 $\pm$ 0.19 <sup>b</sup>   | 0.87                   |
| L-Serine                         | 1.900 $\pm$ 0.08 <sup>a</sup>  | 1.700 $\pm$ 0.09 <sup>ab</sup>  | 0.89                   | 1.400 $\pm$ 0.17 <sup>b</sup>   | 1.700 $\pm$ 0.20 <sup>ab</sup>  | 1.21                   |
| 3-Cyano-L-alanine                | 0.110 $\pm$ 0.01 <sup>bc</sup> | 0.250 $\pm$ 0.03 <sup>a</sup>   | <b>2.27</b>            | 0.060 $\pm$ 0.006 <sup>c</sup>  | 0.150 $\pm$ 0.01 <sup>b</sup>   | <b>2.50</b>            |
| Methionine                       | 0.450 $\pm$ 0.07 <sup>b</sup>  | 0.610 $\pm$ 0.05 <sup>a</sup>   | <b>1.35</b>            | 0.270 $\pm$ 0.04 <sup>c</sup>   | 0.350 $\pm$ 0.01 <sup>c</sup>   | 1.29                   |
| L-Aspartate                      | 0.130 $\pm$ 0.01 <sup>b</sup>  | 0.140 $\pm$ 0.007 <sup>b</sup>  | 1.07                   | 0.110 $\pm$ 0.008 <sup>b</sup>  | 0.200 $\pm$ 0.11 <sup>a</sup>   | <b>1.81</b>            |
| L-Glutamate                      | 0.260 $\pm$ 0.01 <sup>a</sup>  | 0.220 $\pm$ 0.009 <sup>ab</sup> | 0.84                   | 0.130 $\pm$ 0.01 <sup>c</sup>   | 0.200 $\pm$ 0.02 <sup>b</sup>   | <b>1.53</b>            |
| L-Cystine                        | 0.048 $\pm$ 0.02 <sup>a</sup>  | 0.008 $\pm$ 0.0008 <sup>b</sup> | <b>0.21</b>            | 0.004 $\pm$ 0.0007 <sup>b</sup> | 0.007 $\pm$ 0.001 <sup>b</sup>  | 1.40                   |
| Glycine                          | 0.190 $\pm$ 0.01 <sup>a</sup>  | 0.190 $\pm$ 0.006 <sup>a</sup>  | 1.00                   | 0.130 $\pm$ 0.01 <sup>b</sup>   | 0.140 $\pm$ 0.008 <sup>b</sup>  | 1.07                   |
| L-Lysine                         | 0.840 $\pm$ 0.03 <sup>bc</sup> | 1.230 $\pm$ 0.08 <sup>a</sup>   | <b>1.46</b>            | 0.680 $\pm$ 0.07 <sup>c</sup>   | 0.970 $\pm$ 0.04 <sup>b</sup>   | <b>1.42</b>            |
| L-Tyrosine                       | 0.520 $\pm$ 0.08 <sup>b</sup>  | 0.930 $\pm$ 0.06 <sup>a</sup>   | <b>1.78</b>            | 0.570 $\pm$ 0.09 <sup>b</sup>   | 0.530 $\pm$ 0.08 <sup>b</sup>   | 0.92                   |
| L-Tryptophan                     | 1.450 $\pm$ 0.24 <sup>a</sup>  | 1.260 $\pm$ 0.14 <sup>ab</sup>  | 0.86                   | 0.860 $\pm$ 0.17 <sup>b</sup>   | 0.770 $\pm$ 0.03 <sup>b</sup>   | 0.89                   |
| L-5-Oxoproline                   | 4.220 $\pm$ 0.11 <sup>ab</sup> | 4.820 $\pm$ 0.15 <sup>a</sup>   | 1.14                   | 3.690 $\pm$ 0.30 <sup>b</sup>   | 4.440 $\pm$ 0.17 <sup>a</sup>   | <b>1.20</b>            |

|                         |                           |                            |      |                           |                            |      |
|-------------------------|---------------------------|----------------------------|------|---------------------------|----------------------------|------|
| Hydroxylamine           | 0.016±0.004 <sup>a</sup>  | 0.020±0.005 <sup>a</sup>   | 1.25 | 0.021±0.002 <sup>a</sup>  | 0.030±0.005 <sup>a</sup>   | 1.42 |
| L-Proline               | 0.079±0.001 <sup>a</sup>  | 0.078±0.002 <sup>a</sup>   | 0.98 | 0.063±0.008 <sup>b</sup>  | 0.064±0.002 <sup>b</sup>   | 1.01 |
| L-Histidine             | 0.003±0.002 <sup>a</sup>  | 0.005±0.0002 <sup>a</sup>  | 1.67 | 0.004±0.0008 <sup>a</sup> | 0.004±0.0004 <sup>a</sup>  | 1.00 |
| L-Leucine               | 0.016±0.003 <sup>a</sup>  | 0.018±0.002 <sup>a</sup>   | 1.12 | 0.017±0.002 <sup>a</sup>  | 0.019±0.003 <sup>a</sup>   | 1.11 |
| L-Ornithine             | 0.015±0.004 <sup>a</sup>  | 0.035±0.006 <sup>a</sup>   | 2.34 | 0.036±0.01 <sup>a</sup>   | 0.041±0.005 <sup>a</sup>   | 1.13 |
| <b>Sugars</b>           |                           |                            |      |                           |                            |      |
| D-Arabinose             | 0.890±0.11 <sup>b</sup>   | 1.200±0.15 <sup>a</sup>    | 1.34 | 0.430±0.02 <sup>c</sup>   | 0.750±0.06 <sup>b</sup>    | 1.74 |
| D-Fructose              | 1.490±0.12 <sup>a</sup>   | 1.880±0.16 <sup>a</sup>    | 1.26 | 1.740±0.17 <sup>a</sup>   | 1.530±0.21 <sup>a</sup>    | 0.87 |
| D-Fructose-6P           | 0.470±0.03 <sup>a</sup>   | 0.430±0.03 <sup>a</sup>    | 0.91 | 0.300±0.04 <sup>b</sup>   | 0.470±0.03 <sup>a</sup>    | 1.56 |
| D-Glucose-6P            | 0.970±0.06 <sup>a</sup>   | 0.700±0.05 <sup>b</sup>    | 0.72 | 0.690±0.08 <sup>b</sup>   | 0.790±0.11 <sup>ab</sup>   | 1.14 |
| Sucrose                 | 0.940±0.01 <sup>b</sup>   | 1.210±0.036 <sup>a</sup>   | 1.28 | 0.690±0.03 <sup>c</sup>   | 1.020±0.02 <sup>b</sup>    | 1.47 |
| myo-Inositol-1P         | 0.390±0.03 <sup>a</sup>   | 0.280±0.01 <sup>b</sup>    | 0.71 | 0.200±0.02 <sup>c</sup>   | 0.290±0.02 <sup>b</sup>    | 1.45 |
| D-Trehalose             | 0.490±0.03 <sup>b</sup>   | 0.680±0.07 <sup>a</sup>    | 1.38 | 0.700±0.03 <sup>a</sup>   | 0.770±0.06 <sup>a</sup>    | 1.10 |
| D-Ribose                | 0.340±0.01 <sup>b</sup>   | 0.500±0.02 <sup>a</sup>    | 1.47 | 0.370±0.03 <sup>b</sup>   | 0.370±0.01 <sup>b</sup>    | 1.00 |
| Isomaltose              | 0.065±0.01 <sup>a</sup>   | 0.035±0.003 <sup>b</sup>   | 0.53 | 0.013±0.003 <sup>c</sup>  | 0.036±0.008 <sup>b</sup>   | 2.76 |
| D-Saccharate            | 0.420±0.05 <sup>c</sup>   | 1.350±0.20 <sup>a</sup>    | 3.21 | 0.720±0.07 <sup>bc</sup>  | 0.980±0.2 <sup>ab</sup>    | 1.36 |
| meso-Erythritol         | 0.200±0.09 <sup>a</sup>   | 0.160±0.03 <sup>a</sup>    | 0.80 | 0.220±0.05 <sup>a</sup>   | 0.150±0.02 <sup>a</sup>    | 0.68 |
| 1,6-Anhydro-β-D-glucose | 2.100±0.14 <sup>ab</sup>  | 2.630±0.26 <sup>a</sup>    | 1.25 | 1.830±0.07 <sup>b</sup>   | 2.480±0.16 <sup>a</sup>    | 1.35 |
| Glycerate               | 0.140±0.02 <sup>a</sup>   | 0.150±0.02 <sup>a</sup>    | 1.07 | 0.120±0.01 <sup>a</sup>   | 0.110±0.02 <sup>a</sup>    | 0.91 |
| myo-Inositol            | 31.32±4.20 <sup>a</sup>   | 28.33±1.10 <sup>a</sup>    | 0.90 | 15.77±1.0 <sup>b</sup>    | 30.46±1.90 <sup>a</sup>    | 1.93 |
| Glycerol                | 0.040±0.005 <sup>a</sup>  | 0.020±0.002 <sup>b</sup>   | 0.50 | 0.018±0.001 <sup>b</sup>  | 0.037±0.007 <sup>a</sup>   | 2.05 |
| D-Arabitol              | 0.072±0.01 <sup>a</sup>   | 0.058±0.0003 <sup>ab</sup> | 0.80 | 0.044±0.0005 <sup>b</sup> | 0.057±0.001 <sup>ab</sup>  | 1.29 |
| D-Glucose               | 0.045±0.002 <sup>b</sup>  | 0.055±0.002 <sup>a</sup>   | 1.23 | 0.053±0.004 <sup>ab</sup> | 0.053±0.0007 <sup>ab</sup> | 1.00 |
| D-Raffinose             | 0.004±0.002 <sup>b</sup>  | 0.005±0.002 <sup>b</sup>   | 1.25 | 0.001±0.0003 <sup>b</sup> | 0.008±0.003 <sup>a</sup>   | 8.00 |
| Galactinol              | 0.007±0.002 <sup>ab</sup> | 0.007±0.003 <sup>ab</sup>  | 1.00 | 0.002±0.0006 <sup>b</sup> | 0.012±0.002 <sup>a</sup>   | 6.00 |
| <b>Organic acids</b>    |                           |                            |      |                           |                            |      |
| Citrate                 | 19.80±1.90 <sup>a</sup>   | 17.10±0.72 <sup>a</sup>    | 0.86 | 11.52±0.90 <sup>b</sup>   | 18.60±0.65 <sup>a</sup>    | 1.61 |
| α-Ketoglutarate         | 1.060±0.05 <sup>a</sup>   | 1.100±0.16 <sup>a</sup>    | 1.03 | 1.460±0.20 <sup>a</sup>   | 1.090±0.15 <sup>a</sup>    | 0.74 |
| L-Malate                | 155.1±3.40 <sup>b</sup>   | 190.7±10.9 <sup>a</sup>    | 1.23 | 185.0±2.00 <sup>a</sup>   | 195.4±10.0 <sup>a</sup>    | 1.05 |
| L-Citramalate           | 5.110±0.77 <sup>b</sup>   | 8.350±0.49 <sup>a</sup>    | 1.63 | 7.790±0.20 <sup>a</sup>   | 8.700±10.0 <sup>a</sup>    | 1.11 |
| L-Threonate             | 2.640±0.53 <sup>a</sup>   | 1.920±0.16 <sup>ab</sup>   | 0.72 | 1.660±0.10 <sup>b</sup>   | 2.050±0.05 <sup>ab</sup>   | 1.23 |
| Fumarate                | 1.550±0.19 <sup>a</sup>   | 1.490±0.14 <sup>a</sup>    | 0.96 | 0.910±0.10 <sup>b</sup>   | 1.600±0.14 <sup>a</sup>    | 1.75 |
| Succinate               | 36.40±1.70 <sup>a</sup>   | 34.89±1.10 <sup>ab</sup>   | 0.95 | 21.86±2.10 <sup>c</sup>   | 30.23±0.45 <sup>b</sup>    | 1.38 |

|                           |                             |                             |      |                             |                             |      |
|---------------------------|-----------------------------|-----------------------------|------|-----------------------------|-----------------------------|------|
| Glycolate                 | 0.170±0.01 <sup>a</sup>     | 0.160±0.08 <sup>ab</sup>    | 0.94 | 0.110±0.004 <sup>bc</sup>   | 0.130±0.001 <sup>c</sup>    | 1.18 |
| Pyruvate                  | 0.160±0.02 <sup>a</sup>     | 0.150±0.02 <sup>a</sup>     | 0.93 | 0.069±0.01 <sup>b</sup>     | 0.140±0.01 <sup>a</sup>     | 2.02 |
| Malonate                  | 147.2±9.80 <sup>a</sup>     | 119.8±5.70 <sup>b</sup>     | 0.81 | 170.1±7.6 <sup>a</sup>      | 147.7±8.20 <sup>a</sup>     | 0.86 |
| Itaconate                 | 0.370±0.07 <sup>a</sup>     | 0.270±0.02 <sup>a</sup>     | 0.72 | 0.130±0.05 <sup>b</sup>     | 0.230±0.01 <sup>a</sup>     | 1.76 |
| D-Quinate                 | 16.56±0.76 <sup>a</sup>     | 16.51±0.54 <sup>a</sup>     | 0.99 | 16.92±0.88 <sup>a</sup>     | 17.73±1.67 <sup>a</sup>     | 1.04 |
| Galactonate               | 1.570±0.30 <sup>b</sup>     | 3.880±0.15 <sup>a</sup>     | 2.40 | 3.970±0.26 <sup>a</sup>     | 3.580±0.53 <sup>a</sup>     | 0.90 |
| Threonic acid-1,4-lactone | 0.029±0.002 <sup>a</sup>    | 0.020±0.001 <sup>ab</sup>   | 0.68 | 0.019±0.003 <sup>b</sup>    | 0.023±0.003 <sup>ab</sup>   | 1.21 |
| Shikimate                 | 0.063±0.008 <sup>a</sup>    | 0.059±0.007 <sup>ab</sup>   | 0.93 | 0.036±0.006 <sup>b</sup>    | 0.061±0.006 <sup>a</sup>    | 1.69 |
| Isocitrate                | 0.0017±0.0002 <sup>a</sup>  | 0.0019±0.0001 <sup>a</sup>  | 1.11 | 0.0012±0.0001 <sup>b</sup>  | 0.002±0.0001 <sup>a</sup>   | 1.67 |
| Suberic acid              | 0.0027±0.0002 <sup>a</sup>  | 0.0027±0.0004 <sup>a</sup>  | 1.00 | 0.003±0.0004 <sup>a</sup>   | 0.0026±0.0006 <sup>a</sup>  | 0.87 |
| Glutarate                 | 0.006±0.0008 <sup>a</sup>   | 0.006±0.001 <sup>a</sup>    | 1.00 | 0.004±0.0006 <sup>a</sup>   | 0.0060±0.0001 <sup>a</sup>  | 1.50 |
| <b>Other metabolites</b>  |                             |                             |      |                             |                             |      |
| Spermidine                | 0.730±0.02 <sup>b</sup>     | 0.880±0.05 <sup>ab</sup>    | 1.20 | 1.020±0.06 <sup>a</sup>     | 1.040±0.07 <sup>a</sup>     | 1.01 |
| α-Linolenic acid (18:3)   | 3.401±0.31 <sup>c</sup>     | 30.27±3.90 <sup>a</sup>     | 5.35 | 12.25±0.39 <sup>b</sup>     | 2.750±0.21 <sup>c</sup>     | 0.28 |
| Serotonin                 | 0.106±0.01 <sup>b</sup>     | 0.310±0.05 <sup>a</sup>     | 2.90 | 0.11±0.03 <sup>b</sup>      | 0.075±0.01 <sup>b</sup>     | 0.65 |
| Oleic acid (18:1)         | 0.506±0.13 <sup>b</sup>     | 2.490±0.56 <sup>a</sup>     | 4.92 | 2.660±0.21 <sup>a</sup>     | 0.930±0.29 <sup>b</sup>     | 0.34 |
| Nicotianamine             | 0.530±0.15 <sup>a</sup>     | 0.550±0.09 <sup>a</sup>     | 1.03 | 0.360±0.08 <sup>a</sup>     | 0.360±0.04 <sup>a</sup>     | 1.00 |
| Sitosterol                | 1.430±0.04 <sup>b</sup>     | 2.320±0.08 <sup>a</sup>     | 1.62 | 2.470±0.25 <sup>a</sup>     | 1.720±0.14 <sup>b</sup>     | 0.69 |
| Luteolin                  | 0.260±0.02 <sup>a</sup>     | 0.150±0.01 <sup>bc</sup>    | 0.57 | 0.105±0.01 <sup>c</sup>     | 0.210±0.04 <sup>ab</sup>    | 2.00 |
| 5,6-Dihydrouracil         | 25.08±0.77 <sup>a</sup>     | 10.19±2.30 <sup>b</sup>     | 0.40 | 5.370±0.59 <sup>c</sup>     | 2.830±0.40 <sup>c</sup>     | 0.52 |
| Tryptamine                | 0.350±0.02 <sup>ab</sup>    | 0.380±0.05 <sup>a</sup>     | 1.08 | 0.380±0.01 <sup>a</sup>     | 0.270±0.02 <sup>b</sup>     | 0.71 |
| Phosphate                 | 126.7±2.90 <sup>a</sup>     | 79.1±4.30 <sup>bc</sup>     | 0.62 | 68.700±5.00 <sup>c</sup>    | 97.40±12.2 <sup>b</sup>     | 1.41 |
| D-Pinitol                 | 161.6±15.7 <sup>a</sup>     | 172.9±9.6 <sup>a</sup>      | 1.06 | 141.00±2.50 <sup>a</sup>    | 143.0±3.60 <sup>a</sup>     | 1.01 |
| Stigmasterol              | 0.030±0.007 <sup>a</sup>    | 0.024±0.003 <sup>a</sup>    | 0.80 | 0.028±0.003 <sup>a</sup>    | 0.033±0.002 <sup>a</sup>    | 1.17 |
| Palmitic acid (16:0)      | 0.028±0.007 <sup>b</sup>    | 0.068±0.008 <sup>a</sup>    | 2.42 | 0.030±0.003 <sup>b</sup>    | 0.020±0.001 <sup>b</sup>    | 0.67 |
| Nicotinate                | 0.020±0.002 <sup>ab</sup>   | 0.027±0.003 <sup>a</sup>    | 1.35 | 0.013±0.002 <sup>b</sup>    | 0.022±0.002 <sup>a</sup>    | 1.69 |
| trans-Caffeic acid        | 0.0490±0.005 <sup>a</sup>   | 0.073±0.01 <sup>a</sup>     | 1.48 | 0.066±0.01 <sup>a</sup>     | 0.047±0.010 <sup>a</sup>    | 0.71 |
| 1,3-Diaminopropane        | 0.0046±0.001 <sup>b</sup>   | 0.0061±0.002 <sup>ab</sup>  | 1.32 | 0.012±0.002 <sup>a</sup>    | 0.0023±0.002 <sup>b</sup>   | 0.19 |
| Phytol                    | 0.0048±0.001 <sup>b</sup>   | 0.007±0.0004 <sup>a</sup>   | 1.40 | 0.0071±0.0002 <sup>a</sup>  | 0.0070±0.0007 <sup>a</sup>  | 0.98 |
| Apigenin                  | 0.0018±0.0003 <sup>a</sup>  | 0.0025±0.001 <sup>a</sup>   | 1.39 | 0.0011±0.0004 <sup>a</sup>  | 0.0028±0.00043 <sup>a</sup> | 2.54 |
| Putrescine                | 0.0006±0.00007 <sup>a</sup> | 0.0007±0.00004 <sup>a</sup> | 1.16 | 0.0007±0.00003 <sup>a</sup> | 0.0006±0.00005 <sup>a</sup> | 0.85 |
