# Supplementary material
Source: PubMed Central journal article supplement (PMC4987776)
Supplement: pnas.1609440113.sd03.pdf [file pnas.1609440113.sd03.pdf]

**Dataset S3.** Normalized values of metabolites in roots of chickpea plants. Plants were inoculated with either the *McCP-31* or the *MmSWR19* and grown over a period of 30 d after sowing under Pi-sufficient (+P) or -deficient (-P) conditions. Data presented are the means  $\pm$  SE of four independent biological replicates. The values in bold and green indicate a significant increase in -P plants relative to +P plants, whereas the values in bold and red indicate a significant decrease in -P plants relative to +P plants. Data with different letters are significantly different as measured by a Duncan's multiple range test ( $P \leq 0.05$ ).

| Normalized values of metabolites | <i>MmSWR19</i>                  |                                 |                        | <i>McCP-31</i>                   |                                  |                        |
|----------------------------------|---------------------------------|---------------------------------|------------------------|----------------------------------|----------------------------------|------------------------|
|                                  | Sufficient-Pi                   | Deficient-Pi                    | Response ratio [-P/+P] | Sufficient-Pi                    | Deficient-Pi                     | Response ratio [-P/+P] |
| <b>Amino acids</b>               |                                 |                                 |                        |                                  |                                  |                        |
| L-Glutamine                      | 0.042 $\pm$ 0.006 <sup>a</sup>  | 0.018 $\pm$ 0.002 <sup>b</sup>  | <b>0.42</b>            | 0.035 $\pm$ 0.003 <sup>a</sup>   | 0.013 $\pm$ 0.002 <sup>b</sup>   | <b>0.37</b>            |
| L-Asparagine                     | 0.260 $\pm$ 0.04 <sup>ab</sup>  | 0.210 $\pm$ 0.03 <sup>b</sup>   | 0.80                   | 0.390 $\pm$ 0.03 <sup>a</sup>    | 0.220 $\pm$ 0.05 <sup>b</sup>    | <b>0.56</b>            |
| L-Phenylalanine                  | 0.380 $\pm$ 0.02 <sup>a</sup>   | 0.360 $\pm$ 0.01 <sup>a</sup>   | 0.94                   | 0.350 $\pm$ 0.04 <sup>a</sup>    | 0.400 $\pm$ 0.02 <sup>a</sup>    | 1.14                   |
| GABA                             | 0.280 $\pm$ 0.07 <sup>b</sup>   | 0.410 $\pm$ 0.09 <sup>ab</sup>  | 1.46                   | 0.450 $\pm$ 0.04 <sup>ab</sup>   | 0.530 $\pm$ 0.08 <sup>a</sup>    | 1.78                   |
| L-Homoserine                     | 0.163 $\pm$ 0.01 <sup>ab</sup>  | 0.127 $\pm$ 0.01 <sup>b</sup>   | 0.78                   | 0.126 $\pm$ 0.01 <sup>b</sup>    | 0.195 $\pm$ 0.01 <sup>a</sup>    | <b>1.54</b>            |
| L-Threonine                      | 0.180 $\pm$ 0.02 <sup>a</sup>   | 0.200 $\pm$ 0.02 <sup>a</sup>   | 1.12                   | 0.200 $\pm$ 0.02 <sup>a</sup>    | 0.190 $\pm$ 0.03 <sup>a</sup>    | 0.95                   |
| D-Isoleucine                     | 0.002 $\pm$ 0.0002 <sup>a</sup> | 0.002 $\pm$ 0.0002 <sup>a</sup> | 1.05                   | 0.002 $\pm$ 0.0002 <sup>a</sup>  | 0.0027 $\pm$ 0.0003 <sup>a</sup> | 1.03                   |
| L-Alanine                        | 0.103 $\pm$ 0.03 <sup>a</sup>   | 0.075 $\pm$ 0.02 <sup>a</sup>   | 0.72                   | 0.113 $\pm$ 0.02 <sup>a</sup>    | 0.114 $\pm$ 0.01 <sup>a</sup>    | 1.00                   |
| L-Valine                         | 0.168 $\pm$ 0.01 <sup>a</sup>   | 0.166 $\pm$ 0.01 <sup>a</sup>   | 0.98                   | 0.177 $\pm$ 0.01 <sup>a</sup>    | 0.151 $\pm$ 0.02 <sup>a</sup>    | 0.85                   |
| L-Serine                         | 0.420 $\pm$ 0.04 <sup>ab</sup>  | 0.460 $\pm$ 0.02 <sup>ab</sup>  | 1.09                   | 0.490 $\pm$ 0.04 <sup>a</sup>    | 0.370 $\pm$ 0.02 <sup>b</sup>    | <b>0.75</b>            |
| 3-Cyano-L-alanine                | 0.022 $\pm$ 0.002 <sup>a</sup>  | 0.016 $\pm$ 0.0007 <sup>a</sup> | 0.72                   | 0.017 $\pm$ 0.003 <sup>a</sup>   | 0.017 $\pm$ 0.002 <sup>a</sup>   | 1.00                   |
| Methionine                       | 0.020 $\pm$ 0.004 <sup>a</sup>  | 0.007 $\pm$ 0.001 <sup>b</sup>  | <b>0.35</b>            | 0.019 $\pm$ 0.003 <sup>a</sup>   | 0.013 $\pm$ 0.002 <sup>ab</sup>  | 0.68                   |
| L-Aspartate                      | 0.093 $\pm$ 0.01 <sup>a</sup>   | 0.051 $\pm$ 0.003 <sup>b</sup>  | <b>0.54</b>            | 0.079 $\pm$ 0.008 <sup>ab</sup>  | 0.054 $\pm$ 0.009 <sup>b</sup>   | 0.68                   |
| L-Glutamate                      | 0.008 $\pm$ 0.001 <sup>a</sup>  | 0.006 $\pm$ 0.0003 <sup>a</sup> | 0.75                   | 0.009 $\pm$ 0.001 <sup>a</sup>   | 0.007 $\pm$ 0.0008 <sup>a</sup>  | 0.78                   |
| L-Cystine                        | 0.003 $\pm$ 0.0002 <sup>a</sup> | 0.002 $\pm$ 0.0001 <sup>b</sup> | <b>0.64</b>            | 0.0014 $\pm$ 0.0003 <sup>b</sup> | 0.0018 $\pm$ 0.0001 <sup>b</sup> | 1.28                   |
| Glycine                          | 0.014 $\pm$ 0.001 <sup>b</sup>  | 0.020 $\pm$ 0.001 <sup>a</sup>  | <b>1.42</b>            | 0.016 $\pm$ 0.006 <sup>b</sup>   | 0.014 $\pm$ 0.001 <sup>b</sup>   | 0.87                   |
| L-Lysine                         | 0.021 $\pm$ 0.007 <sup>b</sup>  | 0.023 $\pm$ 0.001 <sup>b</sup>  | 1.09                   | 0.040 $\pm$ 0.001 <sup>a</sup>   | 0.022 $\pm$ 0.001 <sup>b</sup>   | <b>0.55</b>            |
| L-Tyrosine                       | 0.002 $\pm$ 0.0005 <sup>a</sup> | 0.003 $\pm$ 0.0005 <sup>a</sup> | 1.42                   | 0.002 $\pm$ 0.0003 <sup>a</sup>  | 0.002 $\pm$ 0.0001 <sup>a</sup>  | 1.00                   |
| L-Tryptophan                     | 0.100 $\pm$ 0.006 <sup>a</sup>  | 0.040 $\pm$ 0.007 <sup>b</sup>  | <b>0.40</b>            | 0.087 $\pm$ 0.007 <sup>a</sup>   | 0.052 $\pm$ 0.012 <sup>b</sup>   | <b>0.59</b>            |
| L-5-Oxoproline                   | 0.412 $\pm$ 0.06 <sup>b</sup>   | 0.341 $\pm$ 0.018 <sup>b</sup>  | 0.82                   | 0.365 $\pm$ 0.03 <sup>ab</sup>   | 0.271 $\pm$ 0.03 <sup>a</sup>    | 0.74                   |
| Hydroxylamine                    | 0.035 $\pm$ 0.003 <sup>a</sup>  | 0.0083 $\pm$ 0.001 <sup>c</sup> | <b>0.23</b>            | 0.032 $\pm$ 0.004 <sup>a</sup>   | 0.022 $\pm$ 0.003 <sup>b</sup>   | <b>0.68</b>            |

|                         |                               |                              |             |                              |                             |             |
|-------------------------|-------------------------------|------------------------------|-------------|------------------------------|-----------------------------|-------------|
| L-Proline               | 0.022±0.001 <sup>a</sup>      | 0.018±0.0006 <sup>b</sup>    | <b>0.81</b> | 0.023±0.0008 <sup>a</sup>    | 0.019±0.0007 <sup>b</sup>   | <b>0.82</b> |
| L-Histidine             | 0.00023±0.00008 <sup>ab</sup> | 0.00013±0.00002 <sup>b</sup> | 0.56        | 0.0002±0.00003 <sup>ab</sup> | 0.0003±0.00002 <sup>a</sup> | 1.50        |
| L-Leucine               | 0.00400±0.002 <sup>a</sup>    | 0.002±0.001 <sup>a</sup>     | 0.50        | 0.005±0.003 <sup>a</sup>     | 0.001±0.001 <sup>a</sup>    | 0.20        |
| L-Ornithine             | 0.00190±0.0008 <sup>b</sup>   | 0.0103±0.003 <sup>a</sup>    | <b>5.40</b> | 0.002±0.0009 <sup>b</sup>    | 0.0021±0.0002 <sup>b</sup>  | 1.05        |
| <b>Sugars</b>           |                               |                              |             |                              |                             |             |
| D-Arabinose             | 0.124±0.01 <sup>a</sup>       | 0.088±0.006 <sup>b</sup>     | <b>0.70</b> | 0.073±0.01 <sup>b</sup>      | 0.084±0.006 <sup>b</sup>    | 1.15        |
| D-Fructose              | 11.70±2.30 <sup>b</sup>       | 12.37±2.1 <sup>b</sup>       | 1.05        | 37.19±5.0 <sup>a</sup>       | 17.40±0.50 <sup>b</sup>     | <b>0.46</b> |
| D-Fructose-6P           | 0.188±0.01 <sup>a</sup>       | 0.100±0.003 <sup>b</sup>     | <b>0.53</b> | 0.131±0.01 <sup>b</sup>      | 0.129±0.003 <sup>b</sup>    | 0.98        |
| D-Glucose-6P            | 0.225±0.007 <sup>a</sup>      | 0.033±0.006 <sup>d</sup>     | <b>0.14</b> | 0.143±0.01 <sup>b</sup>      | 0.096±0.005 <sup>c</sup>    | <b>0.67</b> |
| Sucrose                 | 0.740±0.1 <sup>a</sup>        | 0.600±0.01 <sup>a</sup>      | 0.81        | 0.593±0.02 <sup>a</sup>      | 0.624±0.036 <sup>a</sup>    | 1.05        |
| myo-Inositol-1P         | 0.171±0.007 <sup>a</sup>      | 0.082±0.01 <sup>bc</sup>     | <b>0.48</b> | 0.109±0.009 <sup>b</sup>     | 0.075±0.003 <sup>c</sup>    | <b>0.68</b> |
| D-Trehalose             | 0.280±0.07 <sup>a</sup>       | 0.183±0.01 <sup>a</sup>      | 0.65        | 0.263±0.02 <sup>a</sup>      | 0.210±0.03 <sup>a</sup>     | 0.79        |
| D-Ribose                | 0.054±0.003 <sup>a</sup>      | 0.054±0.009 <sup>a</sup>     | 1.00        | 0.055±0.01 <sup>a</sup>      | 0.066±0.001 <sup>a</sup>    | 1.20        |
| Isomaltose              | 0.0094±0.004 <sup>a</sup>     | 0.0078±0.002 <sup>a</sup>    | 0.83        | 0.011±0.001 <sup>a</sup>     | 0.0073±0.0009 <sup>a</sup>  | 0.66        |
| D-Saccharate            | 0.330±0.04 <sup>b</sup>       | 0.690±0.02 <sup>a</sup>      | <b>2.00</b> | 0.290±0.006 <sup>b</sup>     | 0.630±0.04 <sup>a</sup>     | <b>2.17</b> |
| meso-Erythritol         | 0.0014±0.0004 <sup>a</sup>    | 0.0024±0.0009 <sup>a</sup>   | 1.71        | 0.0007±0.0003 <sup>a</sup>   | 0.0008±0.0003 <sup>a</sup>  | 1.14        |
| 1,6-Anhydro-β-D-glucose | 1.650±0.09 <sup>ab</sup>      | 1.700±0.13 <sup>ab</sup>     | 1.03        | 1.560±0.05 <sup>b</sup>      | 1.730±0.07 <sup>a</sup>     | <b>1.10</b> |
| Glycerate               | 0.089±0.01 <sup>a</sup>       | 0.053±0.002 <sup>b</sup>     | <b>0.59</b> | 0.084±0.007 <sup>a</sup>     | 0.078±0.007 <sup>ab</sup>   | 0.92        |
| myo-Inositol            | 46.21±4.50 <sup>a</sup>       | 29.44±1.7 <sup>b</sup>       | <b>0.63</b> | 35.37±2.20 <sup>b</sup>      | 35.98±3.80 <sup>ab</sup>    | 1.01        |
| Glycerol                | 0.062±0.005 <sup>a</sup>      | 0.008±0.002 <sup>d</sup>     | <b>0.13</b> | 0.048±0.002 <sup>b</sup>     | 0.023±0.002 <sup>c</sup>    | <b>0.48</b> |
| D-Arabitol              | 0.048±0.004 <sup>a</sup>      | 0.027±0.002 <sup>b</sup>     | <b>0.56</b> | 0.032±0.002 <sup>b</sup>     | 0.029±0.0007 <sup>b</sup>   | 0.90        |
| D-Glucose               | 0.096±0.008 <sup>b</sup>      | 0.096±0.01 <sup>b</sup>      | 1.00        | 0.183±0.01 <sup>ab</sup>     | 0.260±0.07 <sup>a</sup>     | 1.42        |
| D-Raffinose             | 0.027±0.003 <sup>b</sup>      | 0.060±0.01 <sup>ab</sup>     | 2.20        | 0.118±0.04 <sup>a</sup>      | 0.128±0.03 <sup>a</sup>     | 1.08        |
| Galactinol              | 0.010±0.0007 <sup>b</sup>     | 0.021±0.001 <sup>a</sup>     | <b>2.10</b> | 0.011±0.003 <sup>b</sup>     | 0.014±0.003 <sup>ab</sup>   | 1.27        |
| <b>Organic acids</b>    |                               |                              |             |                              |                             |             |
| Citrate                 | 88.30±6.60 <sup>a</sup>       | 66.29±10.3 <sup>ab</sup>     | 0.75        | 55.36±4.70 <sup>b</sup>      | 53.05±6.50 <sup>b</sup>     | 0.95        |
| α-Ketoglutarate         | 0.154±0.01 <sup>b</sup>       | 0.165±0.01 <sup>b</sup>      | 1.07        | 0.164±0.006 <sup>b</sup>     | 0.217±0.016 <sup>a</sup>    | <b>1.32</b> |
| L-Malate                | 93.77±5.50 <sup>a</sup>       | 52.89±3.10 <sup>b</sup>      | <b>0.56</b> | 57.95±5.30 <sup>b</sup>      | 86.50±5.20 <sup>a</sup>     | <b>1.49</b> |
| L-Citramalate           | 0.0021±0.0006 <sup>b</sup>    | 0.006±0.0007 <sup>ab</sup>   | 2.80        | 0.0031±0.0004 <sup>b</sup>   | 0.0092±0.0027 <sup>a</sup>  | <b>2.96</b> |
| L-Threonate             | 0.950±0.16 <sup>b</sup>       | 1.700±0.08 <sup>a</sup>      | <b>1.07</b> | 0.530±0.01 <sup>c</sup>      | 1.030±0.18 <sup>b</sup>     | <b>1.32</b> |
| Fumarate                | 0.390±0.03 <sup>a</sup>       | 0.420±0.05 <sup>a</sup>      | 1.07        | 0.320±0.06 <sup>a</sup>      | 0.320±0.06 <sup>a</sup>     | 1.00        |
| Succinate               | 3.360±0.21 <sup>ab</sup>      | 2.730±0.22 <sup>b</sup>      | 0.81        | 2.590±0.05 <sup>b</sup>      | 3.850±0.40 <sup>a</sup>     | <b>1.48</b> |
| Glycolate               | 0.068±0.001 <sup>a</sup>      | 0.054±0.006 <sup>b</sup>     | <b>0.79</b> | 0.064±0.003 <sup>ab</sup>    | 0.064±0.004 <sup>ab</sup>   | 1.00        |

|                            |                                |                               |             |                                |                               |              |
|----------------------------|--------------------------------|-------------------------------|-------------|--------------------------------|-------------------------------|--------------|
| Pyruvate                   | 0.065±0.01 <sup>a</sup>        | 0.069±0.008 <sup>a</sup>      | 1.06        | 0.082±0.01 <sup>a</sup>        | 0.082±0.01 <sup>a</sup>       | 1.00         |
| Malonate                   | 157.7±7.2 <sup>a</sup>         | 103.0±11.0 <sup>c</sup>       | <b>0.65</b> | 119.6±4.40 <sup>bc</sup>       | 141.1±2.60 <sup>ab</sup>      | 1.17         |
| Itaconate                  | 0.146±0.03 <sup>ab</sup>       | 0.105±0.009 <sup>ab</sup>     | 0.72        | 0.094±0.01 <sup>b</sup>        | 0.180±0.03 <sup>a</sup>       | <b>1.91</b>  |
| Galactonate                | 0.395±0.01 <sup>a</sup>        | 0.442±0.01 <sup>a</sup>       | 1.11        | 0.329±0.03 <sup>b</sup>        | 0.452±0.004 <sup>a</sup>      | <b>1.37</b>  |
| Threonic acid-1,4-lactone  | 0.022±0.03 <sup>a</sup>        | 0.017±0.001 <sup>ab</sup>     | 0.77        | 0.007±0.0003 <sup>c</sup>      | 0.013±0.001 <sup>b</sup>      | <b>1.10</b>  |
| Shikimate                  | 0.028±0.004 <sup>a</sup>       | 0.026±0.004 <sup>a</sup>      | 0.92        | 0.016±0.001 <sup>b</sup>       | 0.025±0.0008 <sup>ab</sup>    | 1.56         |
| Isocitrate                 | 0.0089±0.0005 <sup>a</sup>     | 0.0066±0.001 <sup>b</sup>     | <b>0.74</b> | 0.005±0.0004 <sup>b</sup>      | 0.0053±0.0007 <sup>b</sup>    | 1.06         |
| Suberic acid               | 0.0029±0.0005 <sup>a</sup>     | 0.0025±0.0007 <sup>a</sup>    | 0.86        | 0.0021±0.00005 <sup>a</sup>    | 0.0024±0.0004 <sup>a</sup>    | 1.14         |
| Glutarate                  | 0.0023±0.0006 <sup>a</sup>     | 0.0011±0.0004 <sup>a</sup>    | 0.43        | 0.0008±0.0001 <sup>a</sup>     | 0.0022±0.0005 <sup>a</sup>    | 2.75         |
| <b>Other metabolites</b>   |                                |                               |             |                                |                               |              |
| Spermidine                 | 0.460±0.048 <sup>a</sup>       | 0.350±0.01 <sup>a</sup>       | 0.76        | 0.402±0.07 <sup>a</sup>        | 0.455±0.04 <sup>a</sup>       | 1.13         |
| Serotonin                  | 0.114±0.03 <sup>a</sup>        | 0.106±0.03 <sup>a</sup>       | 0.92        | 0.043±0.01 <sup>a</sup>        | 0.069±0.03 <sup>a</sup>       | 1.60         |
| Oleic acid (18:1)          | 0.660±0.34 <sup>a</sup>        | 0.240±0.11 <sup>a</sup>       | 0.36        | 0.280±0.09 <sup>a</sup>        | 0.240±0.01 <sup>a</sup>       | 0.85         |
| Nicotianamine              | 0.064±0.02 <sup>a</sup>        | 0.045±0.01 <sup>a</sup>       | 0.70        | 0.093±0.04 <sup>a</sup>        | 0.068±0.01 <sup>a</sup>       | 0.73         |
| Sitosterol                 | 0.060±0.002 <sup>a</sup>       | 0.035±0.003 <sup>b</sup>      | <b>0.58</b> | 0.049±0.004 <sup>ab</sup>      | 0.034±0.007 <sup>b</sup>      | 0.69         |
| Luteolin                   | 0.193±0.03 <sup>a</sup>        | 0.138±0.03 <sup>ab</sup>      | 0.71        | 0.134±0.01 <sup>ab</sup>       | 0.082±0.01 <sup>b</sup>       | 0.61         |
| 5,6-Dihydrouracil          | 0.610±0.3 <sup>b</sup>         | 0.210±0.008 <sup>b</sup>      | 0.34        | 0.200±0.005 <sup>b</sup>       | 14.21±1.31 <sup>a</sup>       | <b>71.00</b> |
| Tryptamine                 | 0.318±0.04 <sup>a</sup>        | 0.291±0.02 <sup>a</sup>       | 0.91        | 0.449±0.18 <sup>a</sup>        | 0.303±0.06 <sup>a</sup>       | 0.67         |
| Phosphate                  | 123.0±7.20 <sup>a</sup>        | 27.00±7.80 <sup>c</sup>       | <b>0.22</b> | 112.0±7.40 <sup>ab</sup>       | 95.00±2.72 <sup>b</sup>       | 0.84         |
| D-Pinitol                  | 140.1±8.40 <sup>a</sup>        | 102.3±3.80 <sup>b</sup>       | <b>0.73</b> | 136.3±3.00 <sup>a</sup>        | 97.16±1.50 <sup>b</sup>       | <b>0.71</b>  |
| Stigmasterol               | 0.270±0.07 <sup>a</sup>        | 0.190±0.01 <sup>a</sup>       | 0.70        | 0.152±0.03 <sup>a</sup>        | 0.211±0.02 <sup>a</sup>       | 1.38         |
| Palmitic acid (16:0)       | 0.016±0.002 <sup>ab</sup>      | 0.018±0.0007 <sup>a</sup>     | 1.12        | 0.010±0.001 <sup>b</sup>       | 0.013±0.003 <sup>ab</sup>     | 1.30         |
| Nicotinate                 | 0.010±0.001 <sup>a</sup>       | 0.010±0.0005 <sup>a</sup>     | 1.00        | 0.007±0.0006 <sup>b</sup>      | 0.007±0.002 <sup>b</sup>      | 1.00         |
| <i>trans</i> -Caffeic acid | 0.022±0.004 <sup>a</sup>       | 0.011±0.001 <sup>b</sup>      | <b>0.50</b> | 0.001±0.002 <sup>b</sup>       | 0.020±0.001 <sup>a</sup>      | <b>20.00</b> |
| 1,3-Diaminopropane         | 0.0052±0.001 <sup>a</sup>      | 0.0032±0.001 <sup>a</sup>     | 0.61        | 0.004±0.0004 <sup>a</sup>      | 0.0042±0.0006 <sup>a</sup>    | 1.05         |
| Phytol                     | 0.0054±0.0004 <sup>a</sup>     | 0.003±0.0003 <sup>b</sup>     | <b>0.56</b> | 0.0036±0.0003 <sup>b</sup>     | 0.0031±0.0001 <sup>b</sup>    | 0.86         |
| Apigenin                   | 0.0010±0.0003 <sup>ab</sup>    | 0.0005±0.0001 <sup>b</sup>    | 0.50        | 0.001±0.0002 <sup>ab</sup>     | 0.0015±0.0002 <sup>a</sup>    | 1.50         |
| Putrescine                 | 0.000028±0.000003 <sup>a</sup> | 0.00002±0.000002 <sup>a</sup> | 0.71        | 0.000023±0.000002 <sup>a</sup> | 0.00002±0.000001 <sup>a</sup> | 0.86         |
| Allantoin                  | 0.0001±0.00002 <sup>a</sup>    | 0.0001±0.00006 <sup>a</sup>   | 1.00        | 0.00006±0.000007 <sup>a</sup>  | 0.00007±0.00002 <sup>a</sup>  | 1.16         |
