# Supplementary material
Source: PubMed Central journal article supplement (PMC4987776)
Supplement: pnas.1609440113.sd04.pdf [file pnas.1609440113.sd04.pdf]

**Dataset S4.** Normalized values of metabolites in leaves of chickpea plants. Plants were inoculated with either the *McCP-31* or the *MmSWR19* and grown over a period of 30 d after sowing under Pi-sufficient (+P) or -deficient (-P) conditions. Data presented are the means  $\pm$  SE of four independent biological replicates. The values in bold and green indicate a significant increase in -P plants relative to +P plants, whereas the values in bold and red indicate a significant decrease in -P plants relative to +P plants. Data with different letters are significantly different as measured by a Duncan's multiple range test ( $P \leq 0.05$ ).

| Normalized values of metabolites | <i>MmSWR19</i>                  |                                 | Response ratio [-P/+P] | <i>McCP-31</i>                   |                                  | Response ratio [-P/+P] |
|----------------------------------|---------------------------------|---------------------------------|------------------------|----------------------------------|----------------------------------|------------------------|
|                                  | Sufficient-Pi                   | Deficient-Pi                    |                        | Sufficient-Pi                    | Deficient-Pi                     |                        |
| <b>Amino acids</b>               |                                 |                                 |                        |                                  |                                  |                        |
| L-Glutamine                      | 0.036 $\pm$ 0.01 <sup>a</sup>   | 0.011 $\pm$ 0.002 <sup>b</sup>  | <b>0.30</b>            | 0.046 $\pm$ 0.001 <sup>a</sup>   | 0.013 $\pm$ 0.001 <sup>b</sup>   | <b>0.25</b>            |
| L-Asparagine                     | 0.320 $\pm$ 0.08 <sup>a</sup>   | 0.060 $\pm$ 0.006 <sup>b</sup>  | <b>0.18</b>            | 0.280 $\pm$ 0.06 <sup>a</sup>    | 0.053 $\pm$ 0.006 <sup>b</sup>   | <b>0.18</b>            |
| L-Phenylalanine                  | 0.744 $\pm$ 0.03 <sup>a</sup>   | 0.438 $\pm$ 0.01 <sup>b</sup>   | <b>0.58</b>            | 0.771 $\pm$ 0.06 <sup>a</sup>    | 0.395 $\pm$ 0.07 <sup>b</sup>    | <b>0.51</b>            |
| GABA                             | 0.230 $\pm$ 0.05 <sup>a</sup>   | 0.260 $\pm$ 0.02 <sup>a</sup>   | 1.13                   | 0.280 $\pm$ 0.05 <sup>a</sup>    | 0.190 $\pm$ 0.02 <sup>a</sup>    | 0.67                   |
| L-Homoserine                     | 0.067 $\pm$ 0.007 <sup>ab</sup> | 0.093 $\pm$ 0.01 <sup>a</sup>   | 1.38                   | 0.065 $\pm$ 0.01 <sup>ab</sup>   | 0.041 $\pm$ 0.008 <sup>b</sup>   | 0.63                   |
| L-Threonine                      | 1.990 $\pm$ 0.44 <sup>b</sup>   | 2.120 $\pm$ 0.07 <sup>b</sup>   | 1.06                   | 4.530 $\pm$ 0.23 <sup>a</sup>    | 1.450 $\pm$ 0.21 <sup>b</sup>    | <b>0.32</b>            |
| D-Isoleucine                     | 0.064 $\pm$ 0.007 <sup>a</sup>  | 0.075 $\pm$ 0.01 <sup>ab</sup>  | 1.17                   | 0.156 $\pm$ 0.04 <sup>a</sup>    | 0.050 $\pm$ 0.02 <sup>b</sup>    | <b>0.32</b>            |
| L-Alanine                        | 0.440 $\pm$ 0.18 <sup>a</sup>   | 0.472 $\pm$ 0.05 <sup>a</sup>   | 1.07                   | 0.479 $\pm$ 0.08 <sup>a</sup>    | 0.242 $\pm$ 0.01 <sup>a</sup>    | 0.50                   |
| L-Valine                         | 0.867 $\pm$ 0.18 <sup>ab</sup>  | 0.960 $\pm$ 0.007 <sup>ab</sup> | 1.10                   | 1.050 $\pm$ 0.1 <sup>a</sup>     | 0.604 $\pm$ 0.01 <sup>b</sup>    | <b>0.57</b>            |
| L-Serine                         | 9.100 $\pm$ 1.3 <sup>b</sup>    | 11.00 $\pm$ 0.92 <sup>b</sup>   | 1.20                   | 36.00 $\pm$ 1.3 <sup>a</sup>     | 13.69 $\pm$ 1.90 <sup>b</sup>    | <b>0.38</b>            |
| 3-Cyano-L-alanine                | 0.036 $\pm$ 0.01 <sup>ab</sup>  | 0.035 $\pm$ 0.004 <sup>ab</sup> | 0.97                   | 0.096 $\pm$ 0.04 <sup>a</sup>    | 0.014 $\pm$ 0.001 <sup>b</sup>   | <b>0.14</b>            |
| Methionine                       | 0.015 $\pm$ 0.002 <sup>b</sup>  | 0.015 $\pm$ 0.005 <sup>b</sup>  | 1.00                   | 0.088 $\pm$ 0.002 <sup>a</sup>   | 0.0045 $\pm$ 0.001 <sup>b</sup>  | <b>0.05</b>            |
| L-Aspartate                      | 0.582 $\pm$ 0.10 <sup>b</sup>   | 0.459 $\pm$ 0.03 <sup>bc</sup>  | 0.78                   | 1.640 $\pm$ 0.07 <sup>a</sup>    | 0.257 $\pm$ 0.05 <sup>c</sup>    | <b>0.15</b>            |
| L-Glutamate                      | 0.201 $\pm$ 0.04 <sup>b</sup>   | 0.192 $\pm$ 0.01 <sup>b</sup>   | 0.95                   | 0.515 $\pm$ 0.01 <sup>a</sup>    | 0.114 $\pm$ 0.01 <sup>c</sup>    | <b>0.22</b>            |
| L-Cystine                        | 0.011 $\pm$ 0.0002 <sup>a</sup> | 0.011 $\pm$ 0.0003 <sup>a</sup> | 1.00                   | 0.008 $\pm$ 0.001 <sup>b</sup>   | 0.005 $\pm$ 0.001 <sup>c</sup>   | <b>0.62</b>            |
| Glycine                          | 0.041 $\pm$ 0.001 <sup>a</sup>  | 0.024 $\pm$ 0.0009 <sup>b</sup> | <b>0.58</b>            | 0.043 $\pm$ 0.002 <sup>a</sup>   | 0.022 $\pm$ 0.002 <sup>b</sup>   | <b>0.51</b>            |
| L-Lysine                         | 0.095 $\pm$ 0.01 <sup>ab</sup>  | 0.073 $\pm$ 0.008 <sup>b</sup>  | 0.76                   | 0.114 $\pm$ 0.01 <sup>a</sup>    | 0.033 $\pm$ 0.003 <sup>c</sup>   | <b>0.28</b>            |
| L-Tyrosine                       | 0.023 $\pm$ 0.007 <sup>a</sup>  | 0.011 $\pm$ 0.003 <sup>a</sup>  | 0.47                   | 0.039 $\pm$ 0.02 <sup>a</sup>    | 0.021 $\pm$ 0.007 <sup>a</sup>   | 0.53                   |
| L-Tryptophan                     | 0.172 $\pm$ 0.06 <sup>a</sup>   | 0.163 $\pm$ 0.04 <sup>a</sup>   | 0.94                   | 0.107 $\pm$ 0.01 <sup>a</sup>    | 0.104 $\pm$ 0.03 <sup>a</sup>    | 0.97                   |
| L-5-Oxoproline                   | 2.800 $\pm$ 0.55 <sup>b</sup>   | 2.620 $\pm$ 0.13 <sup>b</sup>   | 0.93                   | 5.700 $\pm$ 0.24 <sup>a</sup>    | 1.820 $\pm$ 0.13 <sup>b</sup>    | <b>0.31</b>            |
| Hydroxylamine                    | 0.007 $\pm$ 0.003 <sup>ab</sup> | 0.015 $\pm$ 0.004 <sup>a</sup>  | 2.10                   | 0.0037 $\pm$ 0.0008 <sup>b</sup> | 0.011 $\pm$ 0.0015 <sup>ab</sup> | 2.90                   |
| L-Proline                        | 0.103 $\pm$ 0.005 <sup>b</sup>  | 0.094 $\pm$ 0.005 <sup>ab</sup> | 0.91                   | 0.152 $\pm$ 0.005 <sup>a</sup>   | 0.073 $\pm$ 0.01 <sup>c</sup>    | <b>0.48</b>            |

|                         |                             |                             |             |                            |                            |              |
|-------------------------|-----------------------------|-----------------------------|-------------|----------------------------|----------------------------|--------------|
| L-Histidine             | 0.0005±0.00005 <sup>b</sup> | 0.0005±0.00003 <sup>b</sup> | 1.00        | 0.001±0.00009 <sup>a</sup> | 0.0005±0.0001 <sup>b</sup> | <b>0.50</b>  |
| L-Leucine               | 0.0065±0.001 <sup>a</sup>   | 0.0086±0.0007 <sup>a</sup>  | 1.32        | 0.0063±0.0008 <sup>a</sup> | 0.0088±0.001 <sup>a</sup>  | 1.39         |
| L-Ornithine             | 0.034±0.008 <sup>a</sup>    | 0.038±0.009 <sup>a</sup>    | 1.11        | 0.0017±0.0007 <sup>b</sup> | 0.017±0.004 <sup>a</sup>   | <b>10.00</b> |
| <b>Sugars</b>           |                             |                             |             |                            |                            |              |
| D-Arabinose             | 0.119±0.05 <sup>a</sup>     | 0.048±0.01 <sup>ab</sup>    | 0.40        | 0.039±0.005 <sup>ab</sup>  | 0.010±0.002 <sup>b</sup>   | 0.25         |
| D-Fructose              | 130.8±13.6 <sup>a</sup>     | 90.00±9.70 <sup>b</sup>     | <b>0.68</b> | 123.5±5.50 <sup>a</sup>    | 67.72±3.70 <sup>b</sup>    | <b>0.54</b>  |
| D-Fructose-6P           | 0.567±0.05 <sup>ab</sup>    | 0.702±0.04 <sup>a</sup>     | 1.23        | 0.489±0.06 <sup>bc</sup>   | 0.358±0.05 <sup>c</sup>    | 0.73         |
| D-Glucose-6P            | 0.424±0.02 <sup>a</sup>     | 0.265±0.03 <sup>b</sup>     | <b>0.63</b> | 0.296±0.01 <sup>b</sup>    | 0.152±0.02 <sup>c</sup>    | <b>0.51</b>  |
| Sucrose                 | 0.833±0.01 <sup>a</sup>     | 0.777±0.03 <sup>a</sup>     | 0.93        | 0.560±0.03 <sup>b</sup>    | 0.560±0.03 <sup>b</sup>    | 1.00         |
| myo-Inositol-1P         | 0.389±0.04 <sup>a</sup>     | 0.286±0.02 <sup>b</sup>     | <b>0.85</b> | 0.430±0.02 <sup>a</sup>    | 0.259±0.008 <sup>b</sup>   | <b>0.60</b>  |
| D-Trehalose             | 0.731±0.30 <sup>b</sup>     | 1.830±0.30 <sup>a</sup>     | <b>2.50</b> | 0.100±0.03 <sup>b</sup>    | 0.460±0.02 <sup>b</sup>    | 4.60         |
| D-Ribose                | 0.085±0.007 <sup>b</sup>    | 0.107±0.006 <sup>a</sup>    | <b>1.25</b> | 0.126±0.006 <sup>a</sup>   | 0.086±0.004 <sup>b</sup>   | <b>0.68</b>  |
| Isomaltose              | 0.0078±0.001 <sup>a</sup>   | 0.0109±0.001 <sup>a</sup>   | 1.39        | 0.0078±0.001 <sup>a</sup>  | 0.0076±0.001 <sup>a</sup>  | 0.97         |
| D-Saccharate            | 9.700±2.50 <sup>b</sup>     | 8.300±0.50 <sup>b</sup>     | 0.85        | 12.30±0.83 <sup>a</sup>    | 4.600±0.07 <sup>c</sup>    | <b>0.37</b>  |
| meso-Erythritol         | 0.960±0.20 <sup>b</sup>     | 1.750±0.17 <sup>ab</sup>    | 1.82        | 0.832±0.05 <sup>b</sup>    | 2.400±0.48 <sup>a</sup>    | <b>2.80</b>  |
| 1,6-Anhydro-β-D-glucose | 7.500±0.26 <sup>b</sup>     | 7.660±0.29 <sup>b</sup>     | 1.02        | 12.45±0.12 <sup>a</sup>    | 6.170±0.71 <sup>b</sup>    | <b>0.49</b>  |
| Glycerate               | 0.197±0.05 <sup>ab</sup>    | 0.278±0.02 <sup>a</sup>     | 1.41        | 0.152±0.01 <sup>b</sup>    | 0.115±0.01 <sup>b</sup>    | 0.75         |
| myo-Inositol            | 137.6±12.7 <sup>b</sup>     | 147.5±5.90 <sup>ab</sup>    | 1.07        | 165.0±5.80 <sup>a</sup>    | 134.0±3.00 <sup>b</sup>    | <b>0.81</b>  |
| Glycerol                | 0.049±0.001 <sup>b</sup>    | 0.024±0.001 <sup>c</sup>    | <b>0.48</b> | 0.061±0.002 <sup>a</sup>   | 0.021±0.003 <sup>c</sup>   | <b>0.34</b>  |
| D-Arabitol              | 2.140±0.19 <sup>a</sup>     | 1.590±0.11 <sup>b</sup>     | <b>0.74</b> | 2.360±0.16 <sup>a</sup>    | 1.680±0.05 <sup>b</sup>    | <b>0.71</b>  |
| D-Glucose               | 0.882±0.17 <sup>a</sup>     | 0.271±0.03 <sup>b</sup>     | <b>0.30</b> | 0.430±0.07 <sup>b</sup>    | 0.192±0.02 <sup>b</sup>    | 0.44         |
| D-Raffinose             | 0.0124±0.003 <sup>ab</sup>  | 0.020±0.003 <sup>b</sup>    | 1.61        | 0.0017±0.0006 <sup>b</sup> | 0.029±0.009 <sup>a</sup>   | <b>17.0</b>  |
| Galactinol              | 0.572±0.11 <sup>a</sup>     | 0.287±0.075 <sup>ab</sup>   | 0.50        | 0.035±0.01 <sup>b</sup>    | 0.335±0.12 <sup>a</sup>    | <b>9.50</b>  |
| <b>Organic acids</b>    |                             |                             |             |                            |                            |              |
| Citrate                 | 149.2±20.0 <sup>ab</sup>    | 148.6±12.3 <sup>ab</sup>    | 0.99        | 185.0±14 <sup>a</sup>      | 118.9±10.0 <sup>b</sup>    | <b>0.64</b>  |
| L-Malate                | 243.0±14.0 <sup>a</sup>     | 166.0±8.90 <sup>b</sup>     | <b>0.68</b> | 223.5±5.6 <sup>a</sup>     | 152.1±23.3 <sup>b</sup>    | <b>0.68</b>  |
| L-Citramalate           | 0.114±0.057 <sup>b</sup>    | 0.117±0.005 <sup>b</sup>    | 1.02        | 0.401±0.046 <sup>a</sup>   | 0.086±0.01 <sup>b</sup>    | <b>0.21</b>  |
| L-Threonate             | 48.13±3.20 <sup>b</sup>     | 30.60±1.22 <sup>c</sup>     | <b>0.63</b> | 75.70±6.0 <sup>a</sup>     | 34.26±2.70 <sup>c</sup>    | <b>0.45</b>  |
| Fumarate                | 1.79±0.10 <sup>ab</sup>     | 1.080±0.03 <sup>bc</sup>    | <b>0.60</b> | 2.310±0.3 <sup>a</sup>     | 0.540±0.13 <sup>b</sup>    | <b>0.23</b>  |
| Succinate               | 19.68±0.94 <sup>b</sup>     | 11.46±0.76 <sup>c</sup>     | <b>0.58</b> | 25.45±2.3 <sup>a</sup>     | 12.39±1.48 <sup>c</sup>    | <b>0.48</b>  |
| Glycolate               | 0.075±0.002 <sup>b</sup>    | 0.117±0.007 <sup>a</sup>    | <b>1.56</b> | 0.079±0.009 <sup>b</sup>   | 0.065±0.002 <sup>b</sup>   | 0.82         |
| Pyruvate                | 0.078±0.02 <sup>b</sup>     | 0.147±0.02 <sup>a</sup>     | <b>1.88</b> | 0.165±0.01 <sup>a</sup>    | 0.067±0.007 <sup>b</sup>   | <b>0.40</b>  |
| Malonate                | 0.940±0.09 <sup>a</sup>     | 0.530±0.06 <sup>b</sup>     | <b>0.56</b> | 0.660±0.10 <sup>ab</sup>   | 0.590±0.10 <sup>b</sup>    | 0.89         |

|                                 |                               |                               |             |                               |                               |             |
|---------------------------------|-------------------------------|-------------------------------|-------------|-------------------------------|-------------------------------|-------------|
| Itaconate                       | 0.129±0.02 <sup>ab</sup>      | 0.145±0.02 <sup>ab</sup>      | 1.12        | 0.157±0.03 <sup>a</sup>       | 0.065±0.010 <sup>b</sup>      | <b>0.41</b> |
| D-Quinate                       | 10.20±1.16 <sup>a</sup>       | 12.91±0.60 <sup>a</sup>       | 1.26        | 4.809±1.04 <sup>b</sup>       | 5.360±0.40 <sup>b</sup>       | 1.09        |
| Glutarate                       | 55.42±1.70 <sup>a</sup>       | 43.63±1.30 <sup>b</sup>       | <b>0.78</b> | 52.15±3.60 <sup>a</sup>       | 28.82±3.30 <sup>c</sup>       | <b>0.55</b> |
| Threonic acid-1,4-lactone       | 1.340±0.40 <sup>b</sup>       | 0.679±0.07 <sup>b</sup>       | 0.50        | 4.590±0.69 <sup>a</sup>       | 1.690±0.10 <sup>b</sup>       | <b>0.36</b> |
| Shikimate                       | 0.130±0.01 <sup>a</sup>       | 0.051±0.006 <sup>bc</sup>     | <b>0.39</b> | 0.082±0.01 <sup>b</sup>       | 0.033±0.007 <sup>c</sup>      | <b>0.40</b> |
| Isocitrate                      | 0.035±0.005 <sup>a</sup>      | 0.016±0.002 <sup>b</sup>      | <b>0.45</b> | 0.033±0.002 <sup>a</sup>      | 0.016±0.002 <sup>b</sup>      | <b>0.48</b> |
| Suberic acid                    | 0.0004±0.0001 <sup>a</sup>    | 0.0008±0.0002 <sup>a</sup>    | 2.00        | 0.0014±0.0005 <sup>a</sup>    | 0.0006±0.0001 <sup>a</sup>    | 0.42        |
| Galactonate                     | 55.420±1.76 <sup>a</sup>      | 43.63±1.35 <sup>b</sup>       | <b>0.78</b> | 52.15±3.59 <sup>a</sup>       | 28.82±3.37 <sup>c</sup>       | <b>0.55</b> |
| <b>Other metabolites</b>        |                               |                               |             |                               |                               |             |
| Spermidine                      | 6.180±0.50 <sup>a</sup>       | 3.760±0.30 <sup>b</sup>       | <b>0.60</b> | 5.270±0.30 <sup>a</sup>       | 4.060±0.02 <sup>b</sup>       | <b>0.77</b> |
| $\alpha$ -Linolenic acid (18:3) | 9.670±2.49 <sup>b</sup>       | 6.930±1.45 <sup>bc</sup>      | 0.71        | 20.00±1.28 <sup>a</sup>       | 3.650±0.77 <sup>c</sup>       | <b>0.18</b> |
| Serotonin                       | 2.630±0.33 <sup>ab</sup>      | 2.990±0.27 <sup>ab</sup>      | 1.13        | 3.830±0.50 <sup>a</sup>       | 2.040±0.41 <sup>b</sup>       | <b>0.53</b> |
| Sitosterol                      | 1.104±0.16 <sup>ab</sup>      | 0.868±0.19 <sup>b</sup>       | 0.78        | 1.160±0.13 <sup>ab</sup>      | 1.510±0.16 <sup>a</sup>       | 1.30        |
| Luteolin                        | 0.049±0.005 <sup>a</sup>      | 0.026±0.005 <sup>b</sup>      | <b>0.54</b> | 0.051±0.007 <sup>a</sup>      | 0.036±0.008 <sup>ab</sup>     | 0.70        |
| 5,6-Dihydrouracil               | 18.97±1.10 <sup>a</sup>       | 14.99±0.57 <sup>b</sup>       | <b>0.79</b> | 11.34±0.59 <sup>c</sup>       | 9.740±0.33 <sup>c</sup>       | 0.85        |
| Tryptamine                      | 0.365±0.01 <sup>a</sup>       | 0.331±0.052 <sup>a</sup>      | 0.90        | 0.387±0.07 <sup>a</sup>       | 0.252±0.043 <sup>a</sup>      | 0.65        |
| Phosphate                       | 120.3±11.7 <sup>a</sup>       | 41.38±5.90 <sup>b</sup>       | <b>0.34</b> | 111.9±9.80 <sup>a</sup>       | 55.73±9.80 <sup>b</sup>       | <b>0.49</b> |
| D-Pinitol                       | 417.2±26.1 <sup>a</sup>       | 399.9±6.17 <sup>a</sup>       | 0.95        | 133.0±2.40 <sup>b</sup>       | 367.9±25.1 <sup>a</sup>       | <b>2.70</b> |
| Stigmasterol                    | 0.037±0.01 <sup>a</sup>       | 0.015±0.005 <sup>b</sup>      | <b>0.40</b> | 0.047±0.01 <sup>ab</sup>      | 0.040±0.006 <sup>ab</sup>     | 0.85        |
| Palmitic acid (16:0)            | 0.034±0.001 <sup>ab</sup>     | 0.025±0.006 <sup>bc</sup>     | 0.73        | 0.046±0.005 <sup>a</sup>      | 0.015±0.002 <sup>c</sup>      | <b>0.32</b> |
| Nicotinate                      | 0.079±0.01 <sup>a</sup>       | 0.032±0.004 <sup>b</sup>      | <b>0.40</b> | 0.104±0.01 <sup>a</sup>       | 0.030±0.005 <sup>b</sup>      | <b>0.28</b> |
| <i>trans</i> -Caffeic acid      | 0.016±0.002 <sup>b</sup>      | 0.032±0.008 <sup>b</sup>      | 2.00        | 0.040±0.003 <sup>a</sup>      | 0.015±0.003 <sup>b</sup>      | <b>0.37</b> |
| 1,3-Diaminopropane              | 0.019±0.001 <sup>b</sup>      | 0.043±0.005 <sup>a</sup>      | <b>2.26</b> | 0.026±0.003 <sup>b</sup>      | 0.015±0.001 <sup>b</sup>      | 0.57        |
| Phytol                          | 0.195±0.02 <sup>b</sup>       | 0.161±0.006 <sup>b</sup>      | 0.82        | 0.253±0.009 <sup>a</sup>      | 0.166±0.016 <sup>b</sup>      | <b>0.65</b> |
| Apigenin                        | 0.0006±0.0001 <sup>ab</sup>   | 0.0008±0.00006 <sup>ab</sup>  | 1.34        | 0.0011±0.0002 <sup>a</sup>    | 0.0003±0.0001 <sup>b</sup>    | <b>0.27</b> |
| Putrescine                      | 0.00005±0.000001 <sup>b</sup> | 0.00006±0.000002 <sup>a</sup> | <b>1.20</b> | 0.00006±0.000004 <sup>a</sup> | 0.00005±0.000001 <sup>b</sup> | <b>0.83</b> |
| Allantoin                       | 0.0002±0.00006 <sup>a</sup>   | 0.0002±0.00003 <sup>a</sup>   | 1.00        | 0.0003±0.00003 <sup>a</sup>   | 0.00018±0.00002 <sup>a</sup>  | 0.60        |
